# Supplementary material for: Nanosheet-based magadiite: a controllable two-dimensional trap for selective capture of heavy metals
Source: Royal Society of Chemistry journal article supplement (doi:10.1039/c8ta04790a), 2018-01-01
Supplement: c8ta04790a1.pdf [file c8ta04790a1.pdf]

## **Supplemental Information**

### **Nanosheet-based Magadiite: A Controllable Two-dimensional Trap for Selective Capture of Heavy Metals**

He Ding, Yang Chen, Tianyi Fu, Bai Peng and Xianghai Guo\*

Department of Pharmaceutical Engineering, School of Chemical Engineering and  
Technology, Tianjin University, Tianjin 300350, P. R. China

Key Laboratory of Systems Bioengineering (Ministry of Education), Tianjin University,  
Tianjin, 300072, P. R. China

\*Corresponding author.

# $^1\text{H}$ NMR of $\text{C}_{22}\text{DMIZ}$ , $\text{CDCl}_3$ , 500 MHz

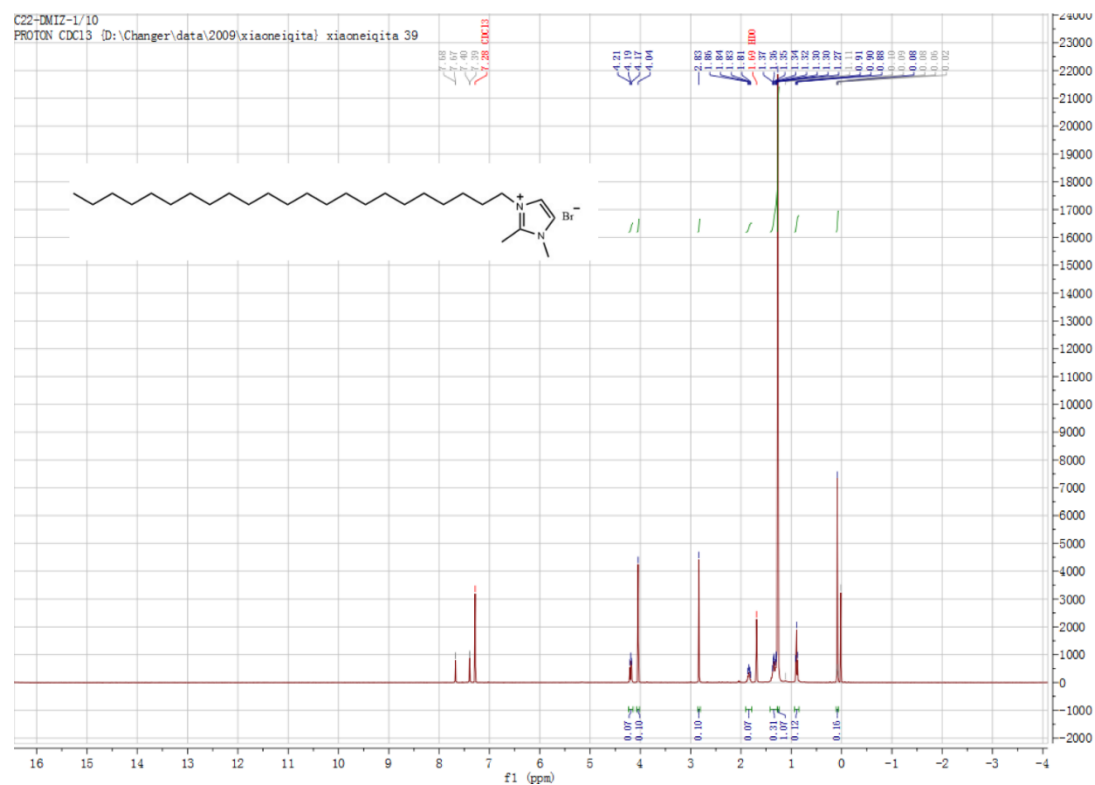

# $^{13}\text{C}$ NMR of $\text{C}_{22}\text{DMIZ}$ , $\text{CDCl}_3$ , 500 MHz

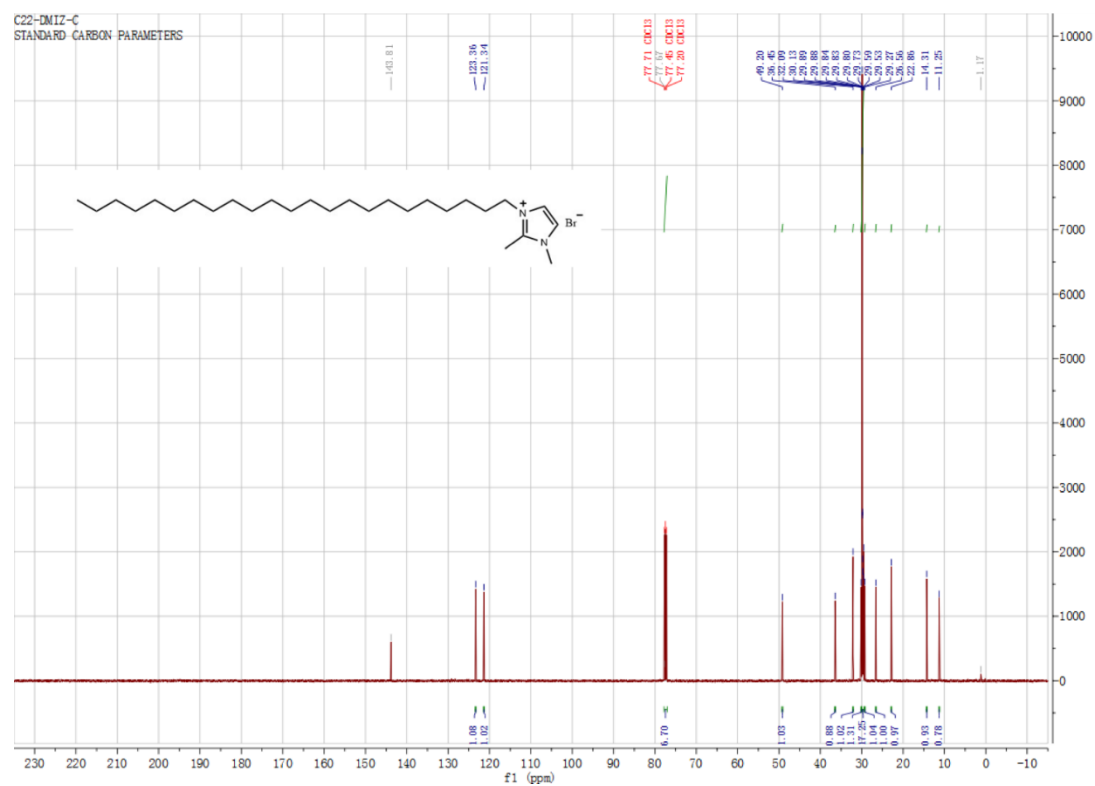

# $^1\text{H}$ NMR of $\text{C}_{18}\text{DMIZ}$ , $\text{CDCl}_3$ , 500 MHz

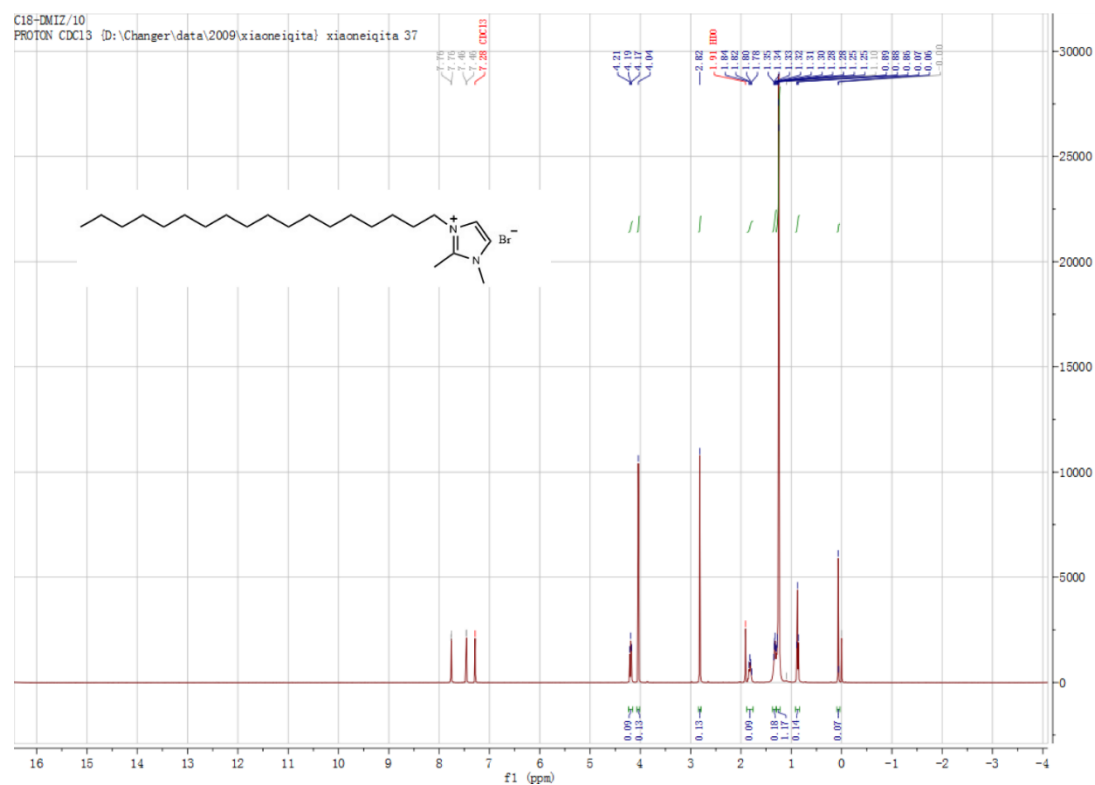

# $^{13}\text{C}$ NMR of $\text{C}_{18}\text{DMIZ}$ , $\text{CDCl}_3$ , 500 MHz

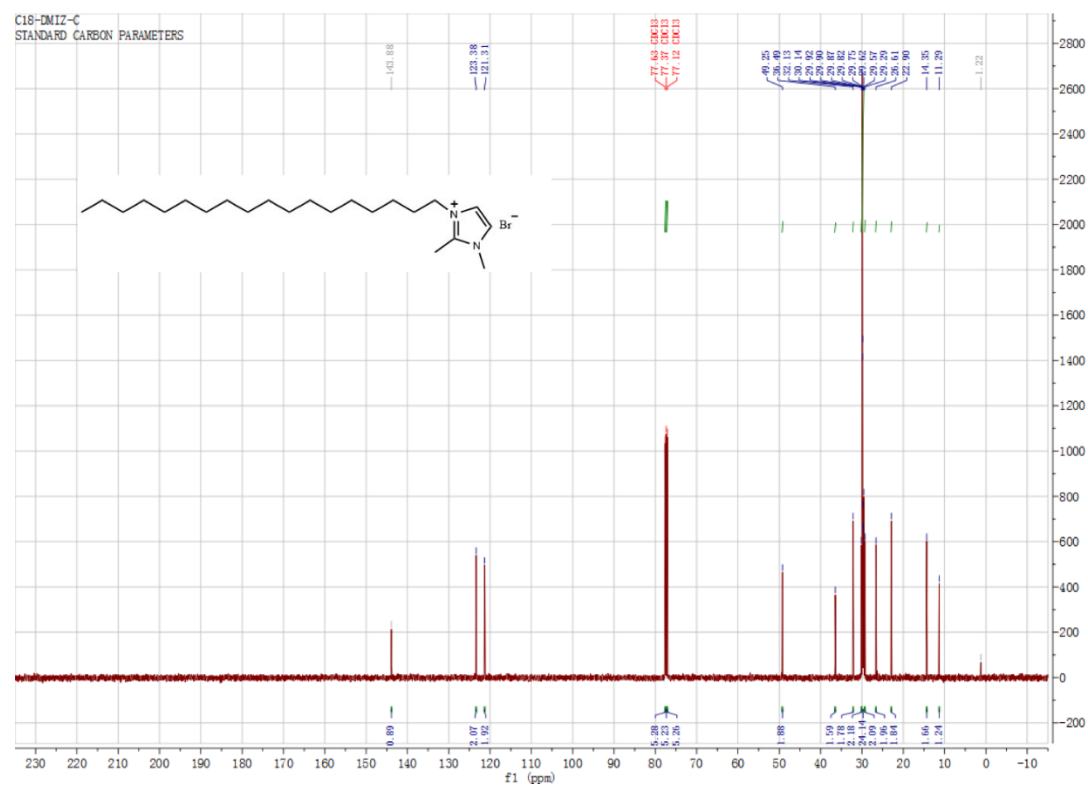



### $^1\text{H}$ NMR of $\text{C}_{12}\text{DMIZ}$ , $\text{CDCl}_3$ , 500 MHz

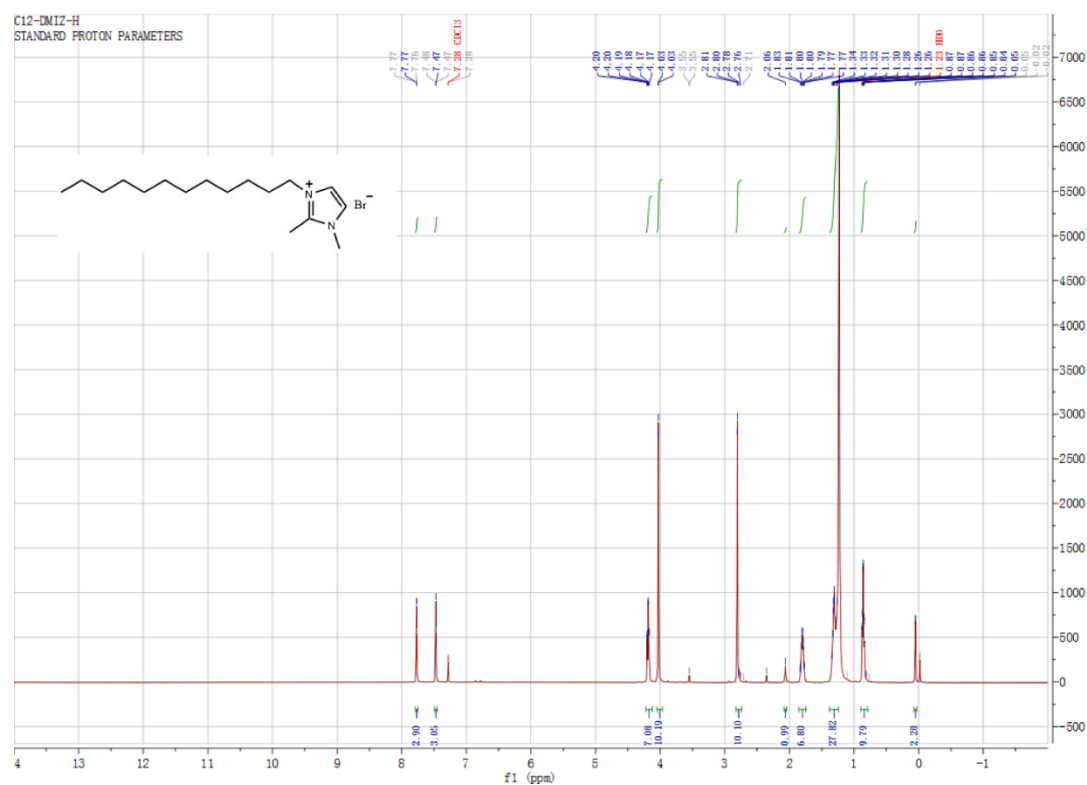

### $^{13}\text{C}$ NMR of $\text{C}_{12}\text{DMIZ}$ , $\text{CDCl}_3$ , 500 MHz

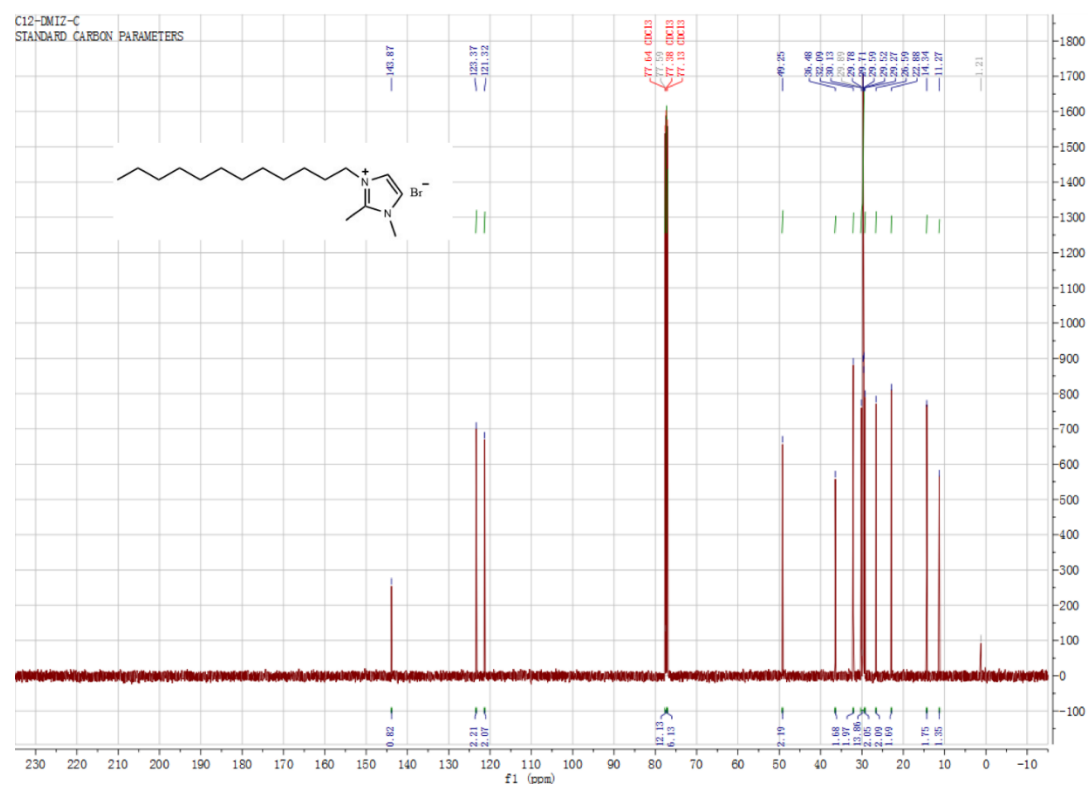

Figure S1.  $^1\text{H}$  and  $^{13}\text{C}$  NMR spectra of OSDAs.

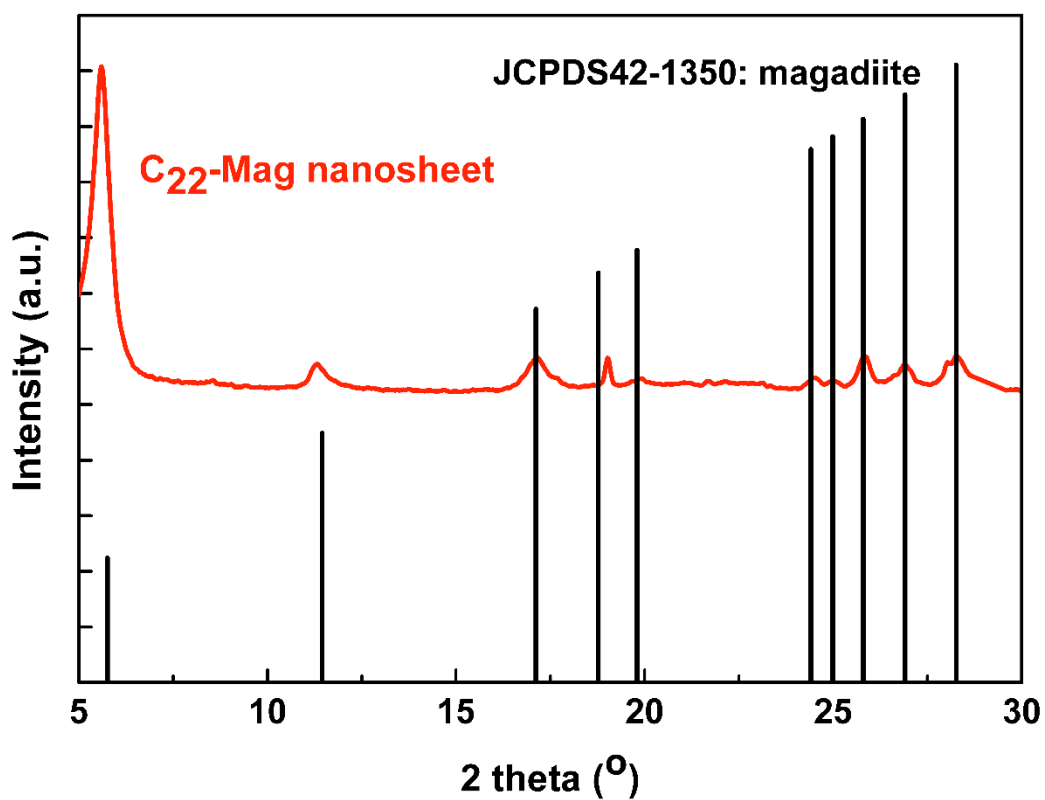

Figure S2. XRD patterns of JCPAS42-1350, magadiite.

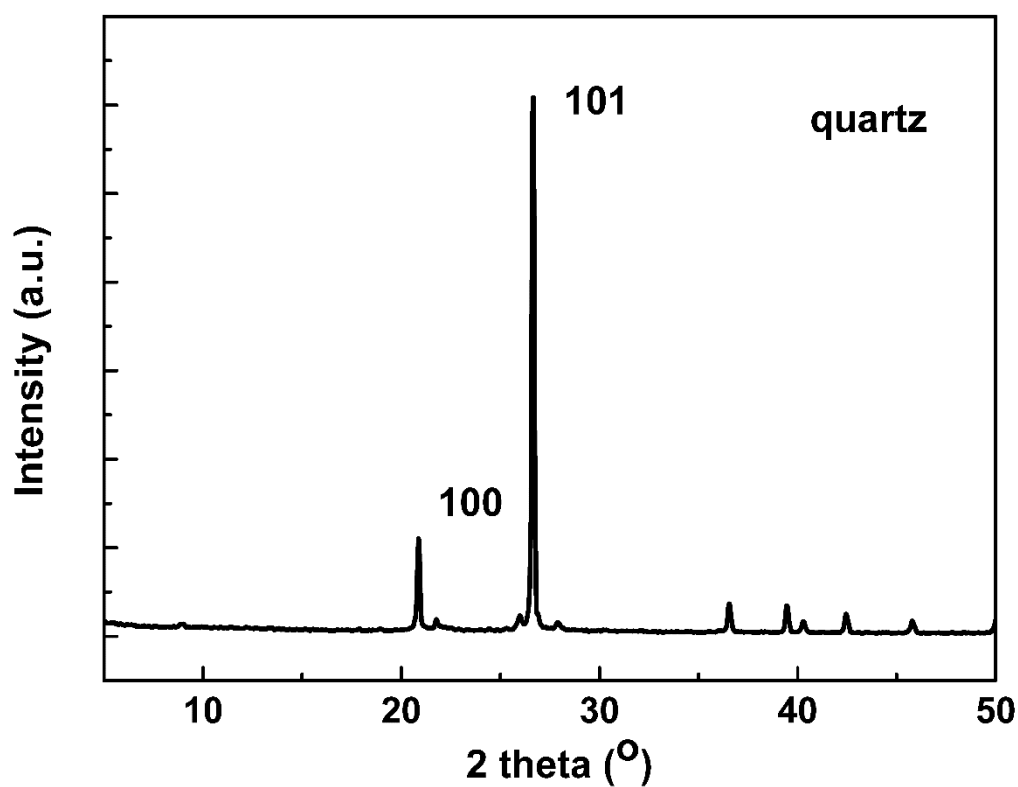

Figure S3. XRD patterns of the CS1 samples.

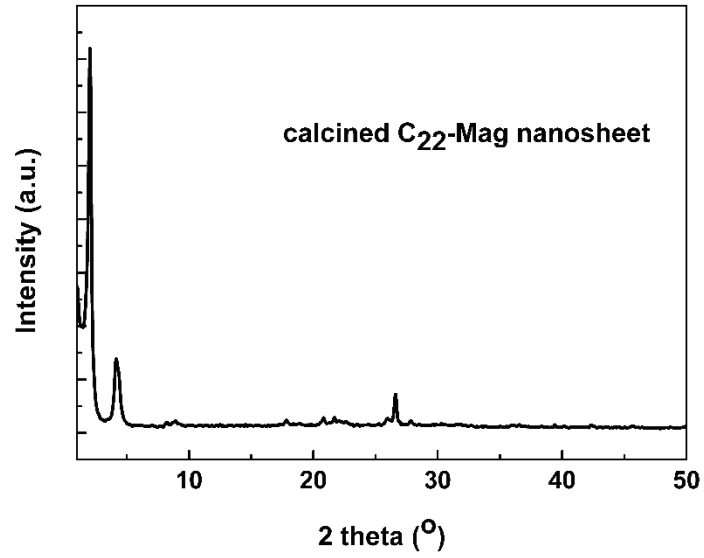

Figure S4. XRD pattern of Calcined C<sub>22</sub>-Mag nanosheets.

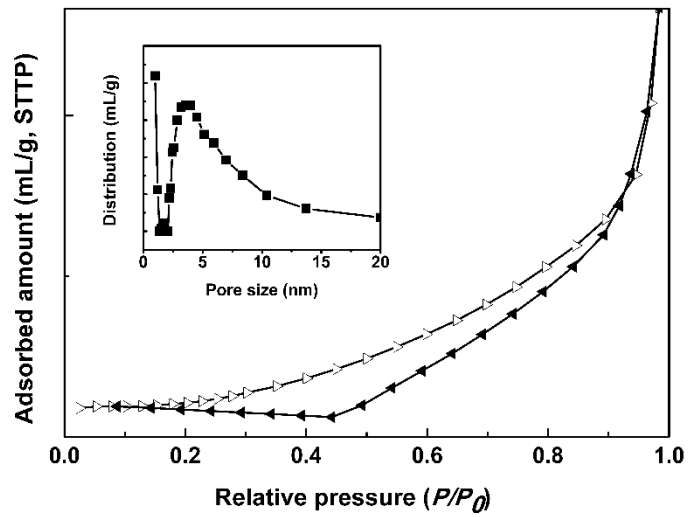

Figure S5. Nitrogen adsorption-desorption isotherm at  $-196\text{ }^{\circ}\text{C}$  and pore size distribution of the calcined C<sub>22</sub>-Mag nanosheets.

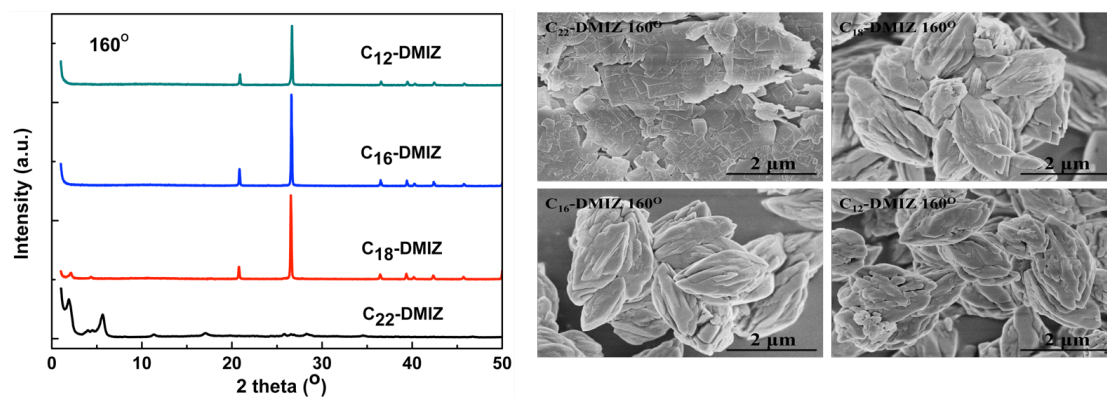

Figure S6. XRD patterns and SEM images of samples directing by imidazolium-based surfactants at 160°.

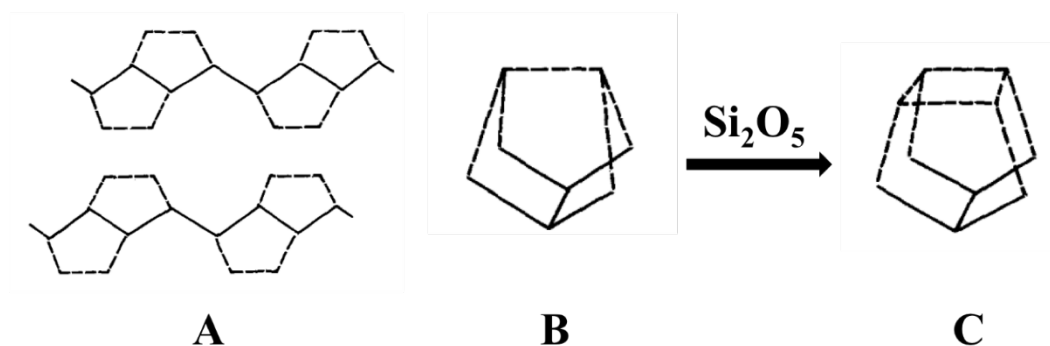

Figure S7. Schematic views of the model structure of magadiite: (A) a-b plane of the dachiardite derived model, (B) type-B block, (C) octosilicate block.

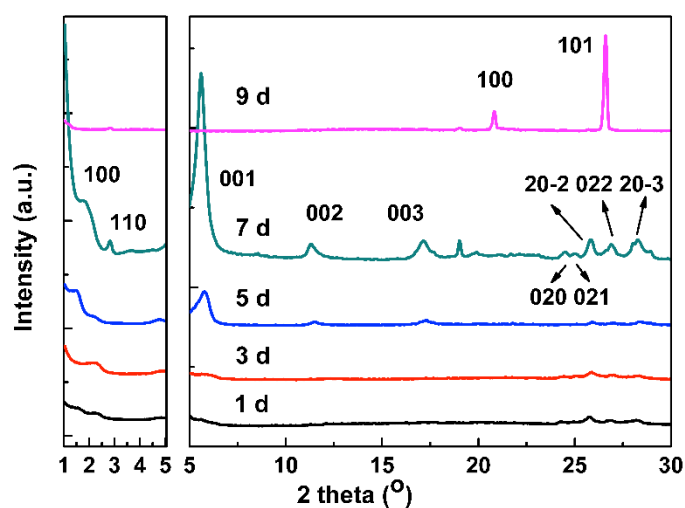

Figure S8. XRD patterns of C<sub>22</sub>-Mag nanosheets subjected to hydrothermal synthesis for different times: 1 d, 3 d, 5 d, 7 d and 9 d.



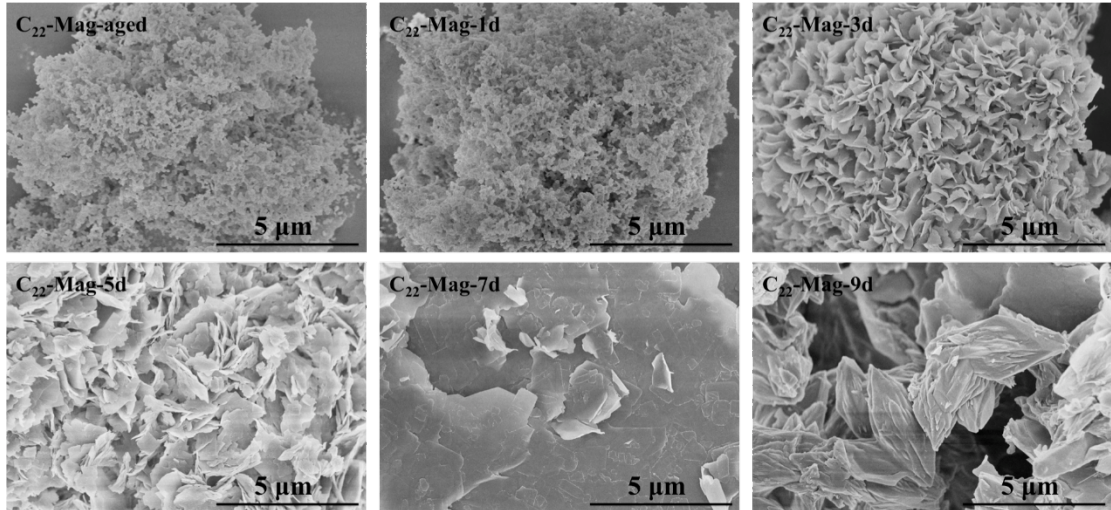

Figure S9. SEM images of C<sub>22</sub>-Mag nanosheets subjected to hydrothermal synthesis for different times: aged, 1 d, 3 d, 5 d, 7 d and 9 d.

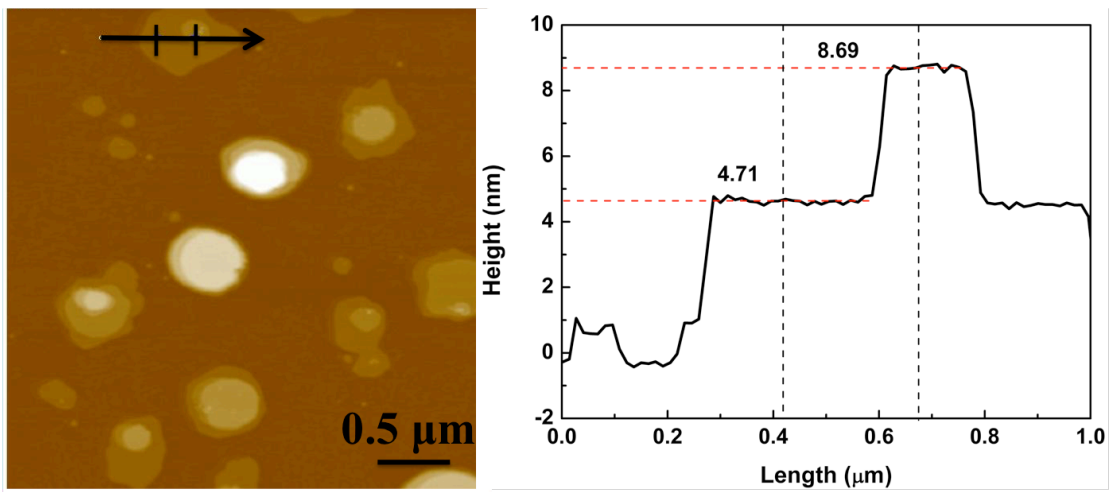

Figure S10. AFM amplitude mode image of calcined C<sub>22</sub>-Mag nanosheets on Si wafer (left) and height profile along the marked line in AFM (right).

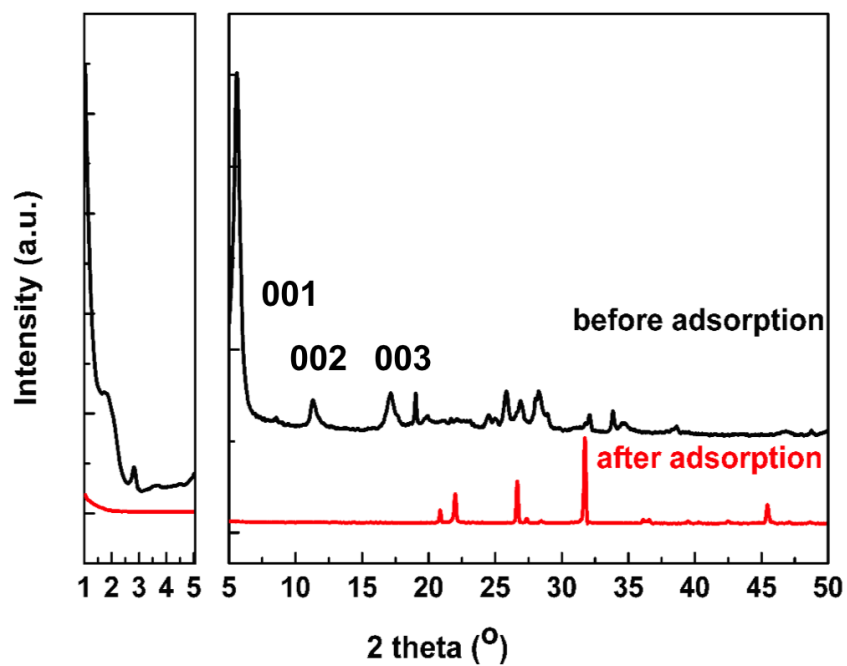

Figure S11. XRD patterns of C<sub>22</sub>-Mag nanosheet before and after adsorption tests.

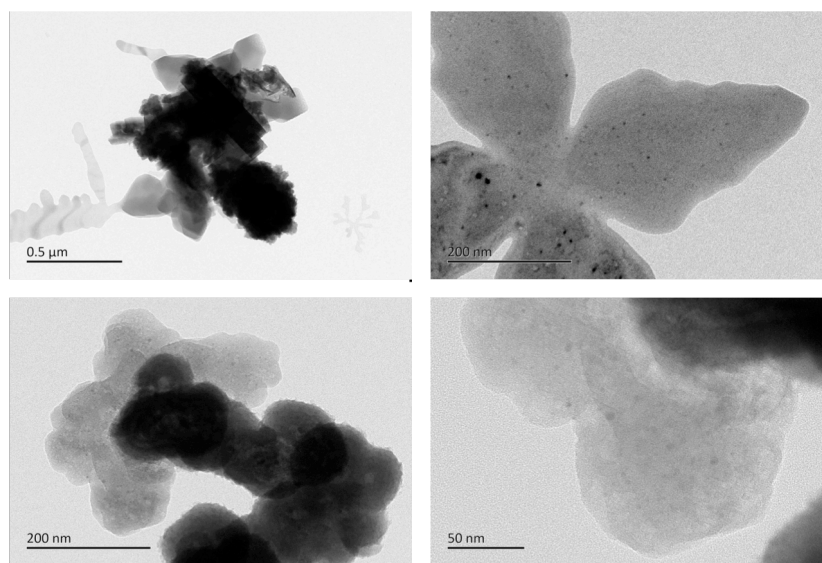

Figure S12. TEM images of C<sub>22</sub>-Mag nanosheets after adsorption tests.

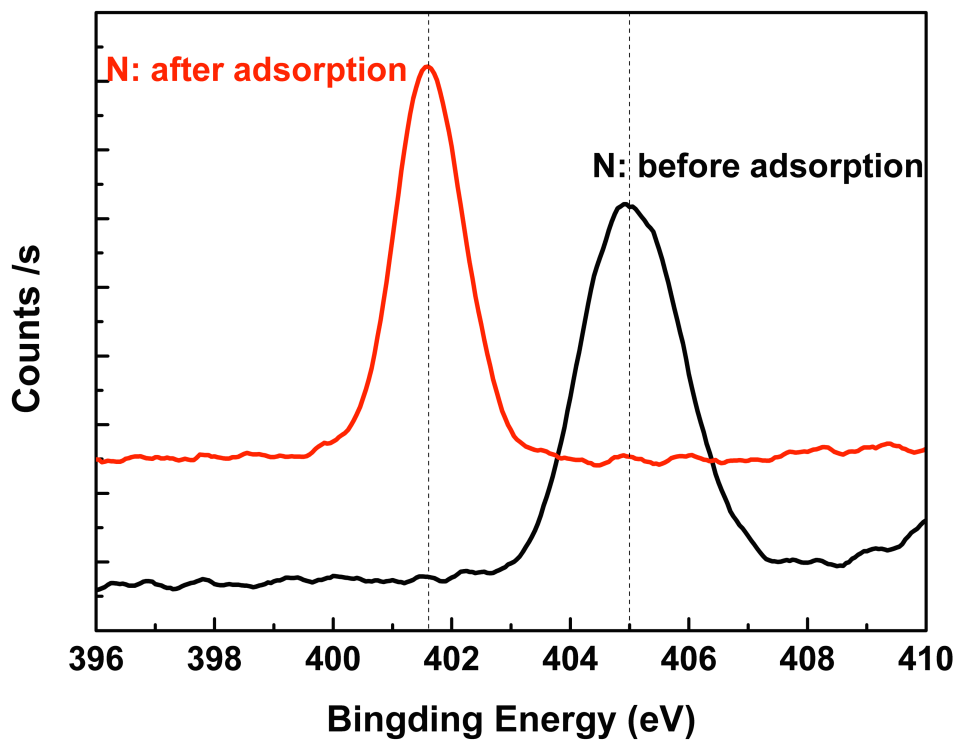

Figure S13. XPS pattern of N element before and after adsorption.

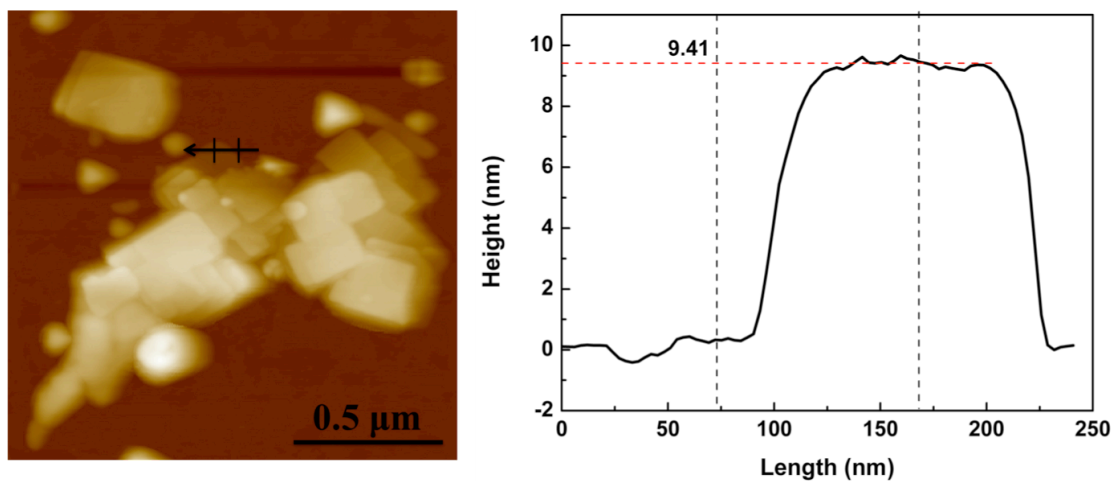

Figure S14. AFM amplitude mode image of C<sub>22</sub>-Mag nanosheets after adsorption tests on Si wafer (left) and height profile along the marked line in AFM (right).

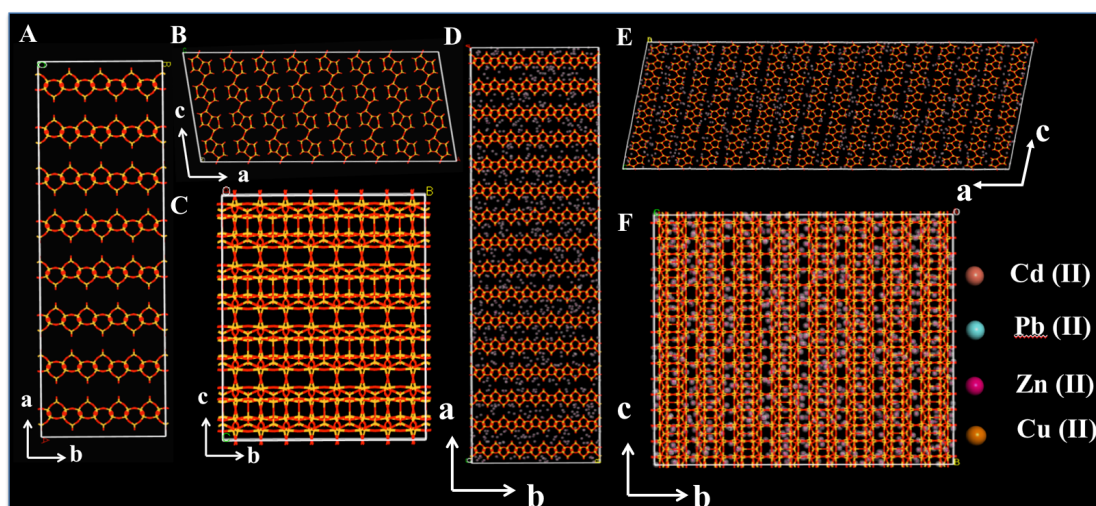

Figure S15. (A, B and C): scheme of raw magadiite nanosheets crystal structure, a: 2.75 nm; b: 0.75 nm; c: 0.92 nm. (D, E and F): scheme of magadiite nanosheets crystal structure after adsorption of heavy metals.

Table S1 Peak temperature of Cx-Mag nanosheets in DTG pattern

| Samples                        | T/°C  |        |        |
|--------------------------------|-------|--------|--------|
| C <sub>22</sub> -Mag nanosheet | 70.00 | 315.00 | 351.14 |
| C <sub>18</sub> -Mag nanosheet | 88.40 | 297.50 | 354.78 |
| C <sub>16</sub> -Mag nanosheet | 82.10 | 298.76 | 353.52 |
| C <sub>12</sub> -Mag nanosheet | 80.84 | 280.31 | 375.92 |

Table S2 Physical characteristics of four kinds of heavy metals.

| Metals  | RBS <sup>[a]</sup> | HR <sup>[b]</sup> | IR <sup>[c]</sup> | PE <sup>[d]</sup> | IP <sup>[e]</sup> | pK <sub>h</sub> <sup>[f]</sup> | HI <sup>[g]</sup> |
|---------|--------------------|-------------------|-------------------|-------------------|-------------------|--------------------------------|-------------------|
| Cu (II) | 2.66               | 4.19              | 0.73              | 1.90              | 7.73              | 7.5                            | 0.104             |
| Pb (II) | 2.68               | 4.01              | 1.19              | 2.33              | 7.42              | 7.6                            | 0.131             |
| Zn (II) | 2.20               | 4.3               | 0.74              | 1.65              | 9.39              | 9.0                            | 0.115             |
| Cd (II) | 2.15               | 4.26              | 0.97              | 1.69              | 8.99              | 10.1                           | 0.081             |

[a] RBS: relative binding strengths; [b] HR: hydrated radius; [c] IR: ionic radius, [d] PE: Pauling electronegativity; [e] IP: ionization potential; [f] pK<sub>h</sub>: negative log of the first hydrolysis constant; [g] HI: hardness index.
